# Supplementary material for: Vehicular ammonia emissions: an underappreciated emission source in densely populated areas
Source: Copernicus journal article supplement (doi:10.5194/acp-23-3819-2023), 2023-03-31
Supplement: Supplementary file 1 [file acp-23-3819-2023-supplement.pdf]

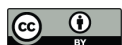

*Supplement of*

## **Vehicular ammonia emissions: an underappreciated emission source in densely populated areas**

**Yifan Wen et al.**

*Correspondence to:* Shaojun Zhang ([zhsjun@tsinghua.edu.cn](mailto:zhsjun@tsinghua.edu.cn))

The copyright of individual parts of the supplement might differ from the article licence.

## Part I. Supplementary Figures

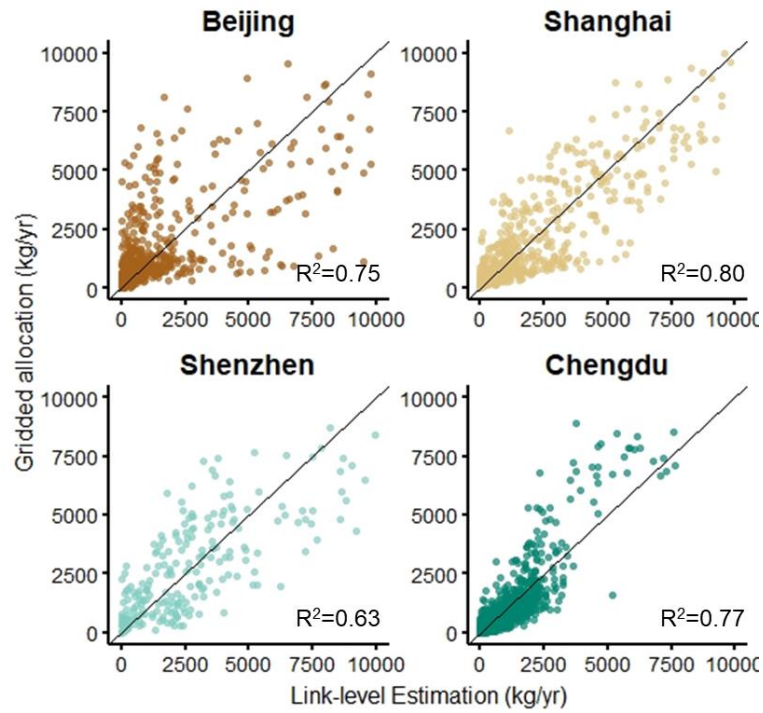

**Fig S1** Comparison of the gridded allocations of on-road NH<sub>3</sub> emissions with the estimations based on link-level inventories.

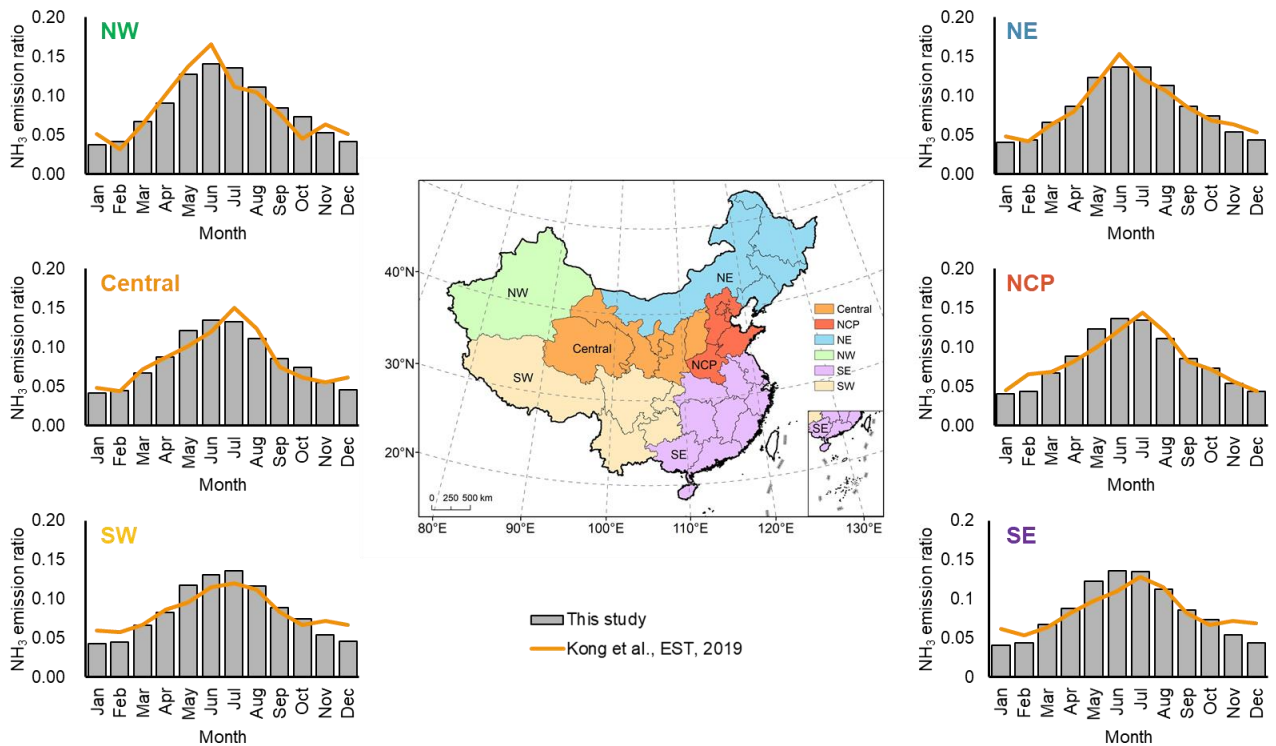

**Fig S2** Comparison of the monthly variations of total anthropogenic NH<sub>3</sub> emissions derived in this study with surface

NH<sub>3</sub> observations obtained from the Ammonia Monitoring Network in different regions of China in Kong et al (Kong et al., 2019). NH<sub>3</sub> emissions are aggregated into six different regions of China, i.e., the North China Plain (NCP), Northeast China (NE), Southwest China (SW), Southeast China (SE), Northwest China (NW), and Central regions, denoted by different colors.

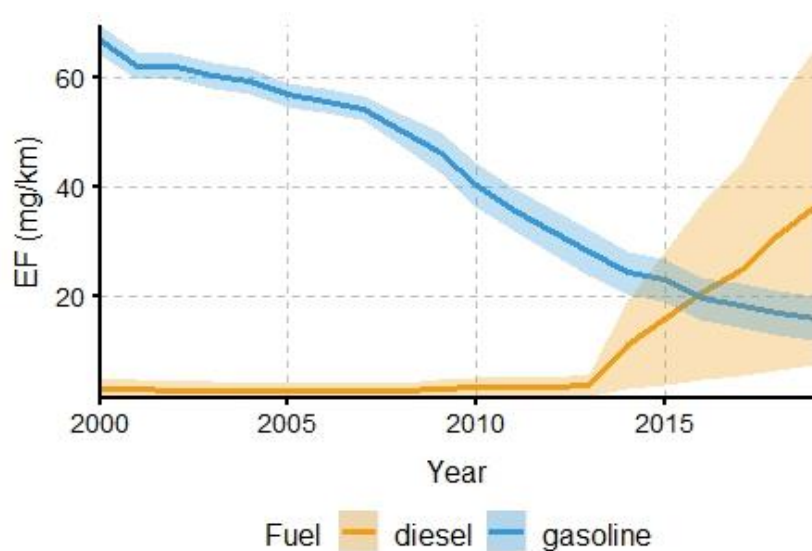

**Fig S3** Trends of fleet average NH<sub>3</sub> EFs for gasoline and diesel vehicles in China, 2000-2019. Shadows show the uncertainty ranges.

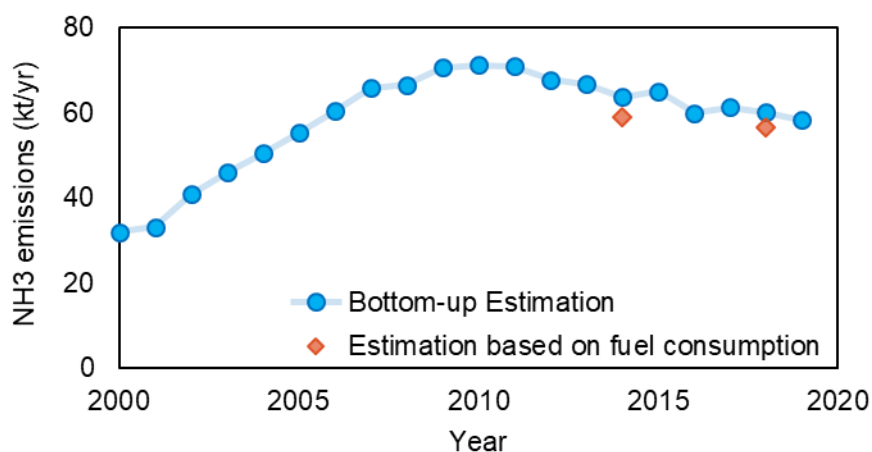

**Fig S4** Validation of the national NH<sub>3</sub> emissions of gasoline fleet estimated by the bottom-up method in this study and top-down estimations based on annual gasoline consumptions.

Note: The national average NH<sub>3</sub> EFs for top-down estimation in 2014 and 2018 referred to the on-road measurements in developing cities and developed cities measured in 2014 by Sun et al. (2017) (Sun et al., 2017).

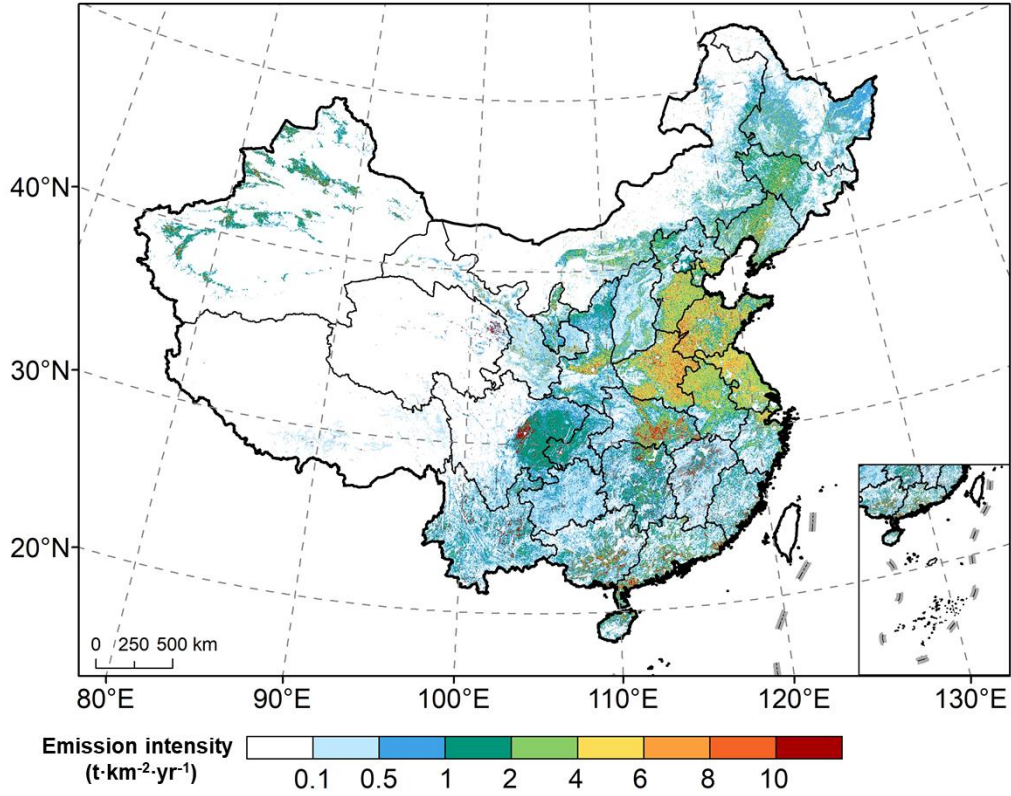

**Fig S5** Highly spatial-resolved (3 km×3 km) agricultural NH<sub>3</sub> emission intensities in mainland China, 2019.

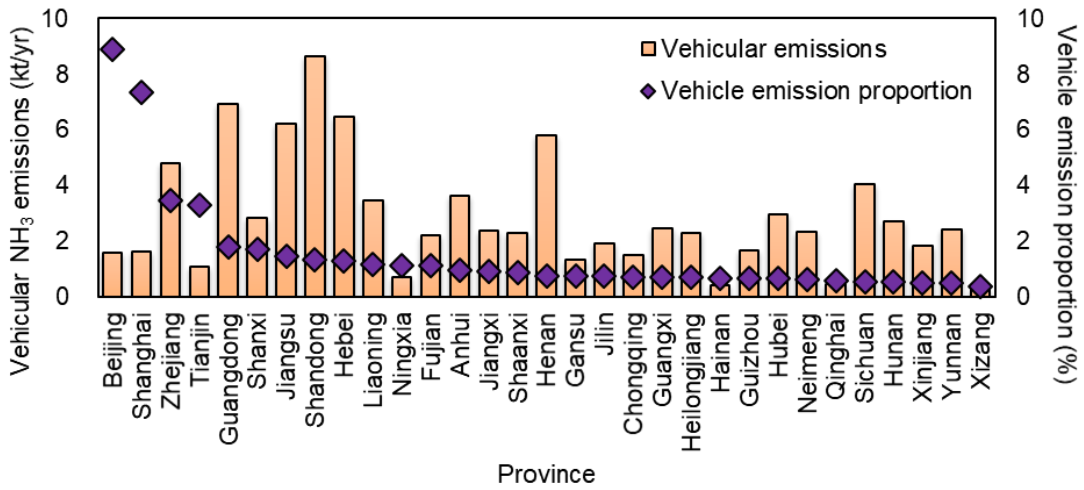

**Fig S6** Annual vehicular NH<sub>3</sub> emissions and the proportions in total anthropogenic NH<sub>3</sub> emissions by province in China, 2019.

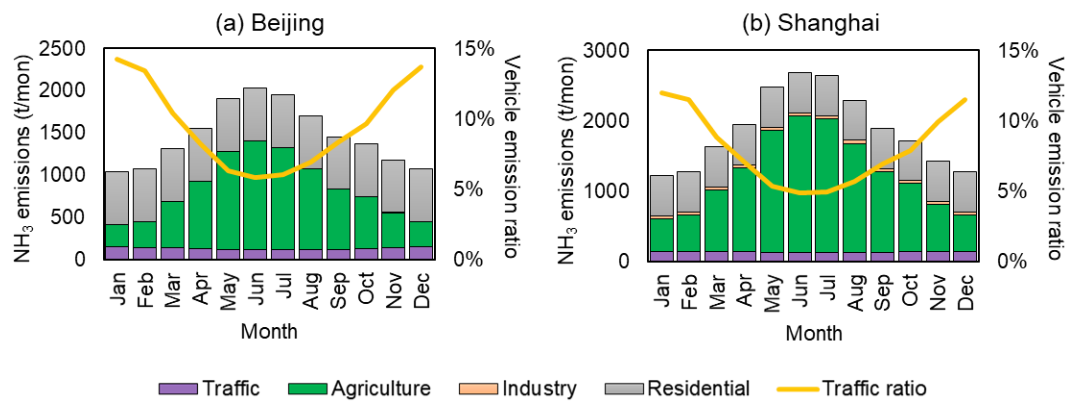

**Fig S7** Monthly variation in anthropogenic NH<sub>3</sub> emissions and vehicle emission proportions in (a) Beijing, and (b) Shanghai in 2019.

## Part II. Supplementary Tables

**Table S1** Definition of vehicle categories in this study.

| Vehicle category              | Abbreviation | Description                                            | Fuel type                | Emission standard   |
|-------------------------------|--------------|--------------------------------------------------------|--------------------------|---------------------|
| Light-duty passenger vehicle  | LDV          | Length $\leq 3.5$ m<br>Passenger capacity $\leq 9$     | Gasoline/diesel/electric | China I to China VI |
| Medium-duty passenger vehicle | MDV          | Length $< 6$ m<br>$9 < \text{Passenger capacity} < 20$ | Gasoline/diesel/electric | China I to China VI |
| Heavy-duty passenger vehicle  | HDV          | Length $\geq 6$ m<br>Passengers capacity $\geq 20$     | Gasoline/diesel/electric | China I to China VI |
| Light-duty truck              | LDT          | Length $< 6$ m<br>GVW <sup>a</sup> $\leq 4500$ kg      | Gasoline/diesel/electric | China I to China VI |
| Medium-duty truck             | MDT          | Length $\geq 6$ m<br>$4500 < \text{GVW} \leq 12000$ kg | Gasoline/diesel/electric | China I to China VI |
| Heavy-duty truck              | HDT          | Length $\geq 6$ m<br>GVW $> 12000$ kg                  | Gasoline/diesel/electric | China I to China VI |
| Motorbike                     | Motorbike    | Two-wheel motorbike                                    | Gasoline                 | China I to China IV |
| Taxi                          | Taxi         |                                                        | Gasoline/electric        | China I to China VI |
| Bus                           | Bus          |                                                        | Diesel/electric          | China I to China VI |

Note: <sup>a</sup> GVW: Gross vehicle weight.

**Table S2** NH<sub>3</sub> EFs of LDGVs or LDGV-dominated fleets reported by various studies.

| Model year | Location        | Experimental Method                                      | Fleet        | Original value                      | NH <sub>3</sub> EF (mg/km) | Reference                      |
|------------|-----------------|----------------------------------------------------------|--------------|-------------------------------------|----------------------------|--------------------------------|
| 2000-2019  | China           | Estimation based on average engine combustion efficiency | China 1 LDGV |                                     | 86.0                       | This study                     |
|            |                 |                                                          | China 2 LDGV |                                     | 60.7                       |                                |
|            |                 |                                                          | China 3 LDGV |                                     | 25.5                       |                                |
|            |                 |                                                          | China 4 LDGV |                                     | 19.1                       |                                |
|            |                 |                                                          | China 5 LDGV |                                     | 10.9                       |                                |
|            |                 |                                                          | China 6 LDGV |                                     | 8.0                        |                                |
| 2001       | Empa, EU        | Dynamometer (EDC)                                        | Euro 3 LDGV  | 22 mg/km                            | 22                         | (Heeb et al., 2006)            |
| 2000-2004  | Swiss, EU       | Dynamometer (EDC)                                        | Euro 3 LDGV  | 16±12 mg/km                         | 16±12                      | (Heeb et al., 2008)            |
|            |                 |                                                          | Euro 4 LDGV  | 10±7 mg/km                          | 10±7                       |                                |
| 2008       | Italy, EU       | Dynamometer (NEDC)                                       | Euro 5 LDGV  | 13.9±11.3 mg/km                     | 13.9±11.3                  | (Suarez-Bertoa et al., 2014)   |
| 2008       | Italy, EU       | Dynamometer (WLTC)                                       | Euro 5 LDGV  | 11±1 mg/km                          | 11±1                       | (Suarez-Bertoa et al., 2015)   |
| 2006-2016  | Shanghai, China | Dynamometer (WLTC)                                       | China 2 LDGV | 30.8 mg/km                          | 30.8                       | (Huang et al., 2018)           |
|            |                 |                                                          | China 3 LDGV | 18.8 mg/km                          | 18.8                       |                                |
|            |                 |                                                          | China 4 LDGV | 12.6 mg/km                          | 12.6                       |                                |
|            |                 |                                                          | China 5 LDGV | 10.8 mg/km                          | 10.8                       |                                |
| 2020       | UK, EU          | Dynamometer (WLTC)                                       | Euro 6 LDGV  | 13.0 mg/km                          | 13.0                       | (Selleri et al., 2022)         |
|            | Beijing, China  | Dynamometer (WLTC)                                       | China 6 LDGV | 0.65±0.38 ~ 8.01±3.12 mg/km         | 0.7±0.4 ~ 8.0±3.1          | (Wang et al., 2018)            |
| 1985-2012  | UK, EU          | Remote sensing                                           | Euro 1 LDGV  | 0.93±0.12 ppbv/ppmv CO <sub>2</sub> | 59.6±7.7                   | (Carslaw and Rhys-Tyler, 2013) |
|            |                 |                                                          | Euro 2 LDGV  | 0.94±0.04 ppbv/ppmv CO <sub>2</sub> | 60.2±2.6                   |                                |
|            |                 |                                                          | Euro 3 LDGV  | 0.78±0.03 ppbv/ppmv CO <sub>2</sub> | 50.0±1.9                   |                                |
|            |                 |                                                          | Euro 4 LDGV  | 0.54±0.02 ppbv/ppmv CO <sub>2</sub> | 34.6±1.3                   |                                |
|            |                 |                                                          | Euro 5 LDGV  | 0.34±0.04 ppbv/ppmv CO <sub>2</sub> | 21.8±2.6                   |                                |
| 2000-2019  | UK, EU          | Remote sensing                                           | Euro 2 LDGV  | 1.13±0.04 g/kg fuel                 | 63.3±2.2                   | (Farren et al., 2021)          |
|            |                 |                                                          | Euro 3 LDGV  | 0.93±0.02 g/kg fuel                 | 52.1±1.1                   |                                |
|            |                 |                                                          | Euro 4 LDGV  | 0.78±0.01 g/kg                      | 43.7±0.6                   |                                |

| Model year      | Location             | Experimental Method        | Fleet          | Original value                      | NH <sub>3</sub> EF (mg/km) | Reference                  |
|-----------------|----------------------|----------------------------|----------------|-------------------------------------|----------------------------|----------------------------|
|                 |                      |                            |                | fuel                                |                            |                            |
|                 |                      |                            | Euro 5 LDGV    | 0.64±0.03 g/kg                      | 35.8±1.7                   |                            |
|                 |                      |                            |                | fuel                                |                            |                            |
|                 |                      |                            | Euro 6 LDGV    | 0.49±0.01 g/kg                      | 27.4±0.6                   |                            |
|                 |                      |                            |                | fuel                                |                            |                            |
|                 | San Jose, US         |                            |                | 0.49±0.01 g/kg                      | 27.4±0.6                   |                            |
|                 |                      |                            |                | fuel                                |                            |                            |
| 2000 in average | Fresno, US           | Remote sensing             | LDGV-dominated | 0.49±0.01 g/kg                      | 27.4±0.6                   | (Bishop et al., 2010)      |
|                 |                      |                            |                | fuel                                |                            |                            |
|                 | LA, US               |                            |                | 0.79±0.02 g/kg                      | 44.2±1.1                   |                            |
|                 |                      |                            |                | fuel                                |                            |                            |
| 2005 in average | Denver, US           |                            | LDGV           | 0.45±0.02 g/kg                      | 25.2±1.1                   |                            |
|                 |                      |                            |                | fuel                                |                            |                            |
| 2004 in average | LA, US               | Remote sensing             | LDGV           | 0.59±0.02 g/kg                      | 33.0±1.1                   | (Bishop and Stedman, 2015) |
|                 |                      |                            |                | fuel                                |                            |                            |
| 2006 in average | Tulsa, US            |                            | LDGV           | 0.44±0.01 g/kg                      | 24.6±0.6                   |                            |
|                 |                      |                            |                | fuel                                |                            |                            |
| Pre 1999        | CA, US               | Tunnel Test                | LDGV-dominated | 78±6.0 mg/km                        | 78±6.0                     | (Kean et al., 2000)        |
| Pre 1995        | San                  |                            |                | 74.3±4.5 mg/km                      | 74.3±4.5                   |                            |
| 1996-2000       | Francisco, US        | Tunnel Test                | LDGV-dominated | 45.1±3.0 mg/km                      | 45.1±3.0                   | (Kean et al., 2009)        |
| Pre 2011        | São Paulo, Brazil    | Tunnel Test                | LDGV-dominated | 44±22 mg/km                         | 44±22                      | (Vieira et al., 2016)      |
| Pre 2015        | Shanghai, China      | Tunnel Test                | LDGV-dominated | 28±5 mg/km                          | 28±5                       | (Chang et al., 2016)       |
| 2000-2007       | CA, US               | On-road mobile measurement | LDGV-dominated | 0.49±0.06 g/kg                      | 27.4±3.4                   | (Sun et al., 2014)         |
|                 |                      |                            |                | fuel                                |                            |                            |
|                 | Developed cities in  |                            |                | 0.37±0.06 ppbv/ppmv CO <sub>2</sub> | 23.7±3.8                   |                            |
| Pre 2014        | China                | On-road mobile measurement | LDGV-dominated |                                     |                            | (Sun et al., 2017)         |
|                 | Developing cities in |                            |                | 0.50±0.08 ppbv/ppmv CO <sub>2</sub> | 32.0±5.1                   |                            |
|                 | China                |                            |                |                                     |                            |                            |

Note: To compare NH<sub>3</sub> EFs from various literatures, the units were converted to mg/km based on the following rules:  
1) For original value in units of ppbv/ppmv CO<sub>2</sub>, the NH<sub>3</sub>:CO<sub>2</sub> emission ratio can be converted to NH<sub>3</sub> EF (mg/kg fuel) using Eq. S(1) (Sun et al., 2017).



$$EF(\text{mg/kg fuel}) = \frac{ER(\text{in ppbv/ppmv CO}_2) \cdot 17W_C F_{CO_2}}{12} \quad (1)$$

where  $W_C = 0.85$ , is the mass fraction of carbon in gasoline.  $F_{CO_2} = 95\% \sim 99\%$ , is the molar fraction of  $CO_2$  in the total combusted carbon, which can be approximated by Eq. S(2) (the contributions of hydrocarbons/soots are negligible).

$$F_{CO_2} = \frac{[CO_2]}{[CO_2] + [CO]} \quad (2)$$

2) The original value in units of g/kg fuel can be converted to mg/km by Eq. S(3).

$$EF(\text{mg/km}) = EF(\text{g/kg fuel}) \cdot FC(\text{g/km}) \quad (3)$$

where FC is the fleet average fuel consumption.  $FC = 56 \text{ g/km}$  for LDGVs according to COPERT model (Ntziachristos et al., 2009).

**Table S3**  $NH_3$  EFs of HDDVs reported by various studies.

| Reference                          | Experimental Method           | Emission standard      | After-treatment      | Original value      | $NH_3$ EF (mg/km) <sup>a</sup> |
|------------------------------------|-------------------------------|------------------------|----------------------|---------------------|--------------------------------|
| This study                         | PEMS and Dynamometer (C-WTVC) | China III              | Without SCR          | 0.02±0.01 g/kg fuel | 4.4±2.4                        |
|                                    |                               | China IV/V             | SCR-equipped         | 0.31±0.50 g/kg fuel | 73.9±118.7                     |
| (Suarez-Bertoa et al., 2016)       | PEMS                          | Euro V                 | SCR-equipped         | 41.0±17.4 mg/kWh    | 102.5±43.5                     |
| (Tadano et al., 2014)              | Dynamometer (ESC)             | Euro V                 | Without SCR          | 4±2 mg/kWh          | 10±5                           |
|                                    |                               |                        | SCR-equipped         | 60±20 mg/kWh        | 150±50                         |
| (Preble et al., 2019)              | Field sampling                | 2010-2018 MY           | SCR-equipped         | 0.18±0.07 g/kg fuel | 43.2±16.8                      |
| (Jeon et al., 2016)                | Dynamometer (WTHC)            | Euro VI                | SCR+ASC <sup>b</sup> | 5 mg/kWh            | 12.5                           |
| (Khalek et al., 2015)              | Dynamometer (FTP)             | 2010-compliant engines | SCR+ASC              | 3.4±1.9 mg/kWh      | 8.4±4.7                        |
| (Mendoza-Villafuerte et al., 2017) | PEMS                          | Euro VI                | SCR+ASC              | 13.5±4.5 mg/kWh     | 33.8±11.3                      |

Note: <sup>a</sup> The units of EF were converted to mg/km based on the following rules:

1) The original value in units of g/kg fuel can be converted to mg/km by Eq. S(4).

$$EF(\text{mg/km}) = EF(\text{g/kg fuel}) \cdot FC(\text{g/km}) \quad (4)$$

where FC is the fleet average fuel consumption.  $FC = 240 \text{ g/km}$  for HDDVs according to COPERT model (Ntziachristos et al., 2009).

2) The original value in units of mg/kWh can be converted to mg/km by Eq. S(5), based on the energy consumption value ( $EC = 9 \text{ MJ/km}$  for HDDVs) according to COPERT model (Ntziachristos et al., 2009).

$$EF(\text{mg/km}) = EF(\text{mg/kWh})/3.6 \cdot EC(\text{MJ/km}) \quad (5)$$

where EC is the fleet average energy consumption. EC=9 MJ/km for HDDVs according to COPERT model (Ntziachristos et al., 2009).

<sup>b</sup> Ammonia Slip Catalyst (ASC).

**Table S4** Uncertainty ranges of NH<sub>3</sub> emission factors used in this study.

| Vehicle types | Emission standards | Uncertainty ranges |
|---------------|--------------------|--------------------|
| LDGV          | Euro/China 2       | 4%                 |
| LDGV          | Euro/China 3       | 27%                |
| LDGV          | Euro/China 4       | 25%                |
| LDGV          | Euro/China 5       | 33%                |
| LDGV          | Euro/China 6       | 38%                |
| HDDV          | Without SCR        | 52%                |
| HDDV          | SCR-equipped       | 81%                |
| HDDV          | SCR+AMOX           | 45%                |

## References

- Bishop, G. A. and Stedman, D. H.: Reactive Nitrogen Species Emission Trends in Three Light-/Medium-Duty United States Fleets, *Environ Sci Technol*, 49, 11234-11240, 10.1021/acs.est.5b02392, 2015.
- Bishop, G. A., Peddle, A. M., Stedman, D. H., and Zhan, T.: On-road emission measurements of reactive nitrogen compounds from three California cities, *Environ Sci Technol*, 44, 3616-3620, 10.1021/es903722p, 2010.
- Carslaw, D. C. and Rhys-Tyler, G.: New insights from comprehensive on-road measurements of NO<sub>x</sub>, NO<sub>2</sub> and NH<sub>3</sub> from vehicle emission remote sensing in London, UK, *Atmospheric Environment*, 81, 339-347, 10.1016/j.atmosenv.2013.09.026, 2013.
- Chang, Y. H., Zou, Z., Deng, C. R., Huang, K., Collett, J. L., Lin, J., and Zhuang, G. S.: The importance of vehicle emissions as a source of atmospheric ammonia in the megacity of Shanghai, *Atmospheric Chemistry and Physics*, 16, 3577-3594, 10.5194/acp-16-3577-2016, 2016.
- Farren, N. J., Davison, J., Rose, R. A., Wagner, R. L., and Carslaw, D. C.: Characterisation of ammonia emissions from gasoline and gasoline hybrid passenger cars, *Atmospheric Environment: X*, 11, 10.1016/j.aeaoa.2021.100117, 2021.
- Heeb, N. V., Saxer, C. J., Forss, A. M., and Bruhlmann, S.: Correlation of hydrogen, ammonia and nitrogen monoxide (nitric oxide) emissions of gasoline-fueled Euro-3 passenger cars at transient driving, *Atmospheric Environment*, 40, 3750-3763, 10.1016/j.atmosenv.2006.03.002, 2006.
- Heeb, N. V., Saxer, C. J., Forss, A. M., and Bruhlmann, S.: Trends of NO-, NO<sub>2</sub>-, and NH<sub>3</sub>-emissions from gasoline-fueled euro-3-to euro-4-passenger cars, *Atmospheric Environment*, 42, 2543-2554, 10.1016/j.atmosenv.2007.12.008, 2008.
- Huang, C., Hu, Q., Lou, S., Tian, J., Wang, R., Xu, C., An, J., Ren, H., Ma, D., Quan, Y., Zhang, Y., and Li, L.: Ammonia Emission Measurements for Light-Duty Gasoline Vehicles in China and Implications for Emission Modeling, *Environ Sci Technol*, 52, 11223-11231, 10.1021/acs.est.8b03984, 2018.
- Jeon, J., Lee, J. T., and Park, S.: Nitrogen Compounds (NO, NO<sub>2</sub>, N<sub>2</sub>O, and NH<sub>3</sub>) in NO<sub>x</sub> Emissions from Commercial EURO VI Type Heavy-Duty Diesel Engines with a Urea-Selective Catalytic Reduction System, *Energy Fuels*, 30, 6828-6834, 10.1021/acs.energyfuels.6b01331, 2016.
- Kean, A. J., Harley, R. A., Littlejohn, D., and Kendall, G. R.: On-road measurement of ammonia and other motor vehicle exhaust emissions, *Environmental Science & Technology*, 34, 3535-3539, DOI 10.1021/es991451q, 2000.
- Kean, A. J., Littlejohn, D., Ban-Weiss, G. A., Harley, R. A., Kirchstetter, T. W., and Lunden, M. M.: Trends in on-road vehicle emissions of ammonia, *Atmospheric Environment*, 43, 1565-1570, 10.1016/j.atmosenv.2008.09.085, 2009.
- Khalek, I. A., Blanks, M. G., Merritt, P. M., and Zielinska, B.: Regulated and unregulated emissions from modern 2010 emissions-compliant heavy-duty on-highway diesel engines, *J Air Waste Manag Assoc*, 65, 987-1001, 10.1080/10962247.2015.1051606, 2015.
- Kong, L., Tang, X., Zhu, J., Wang, Z. F., Pan, Y. P., Wu, H. J., Wu, L., Wu, Q. Z., He, Y. X., Tian, S. L., Xie, Y. Z., Liu, Z. R., Sui, W. X., Han, L. N., and Carmichael, G.: Improved Inversion of Monthly Ammonia Emissions in China Based on the Chinese Ammonia Monitoring Network and Ensemble Kalman Filter, *Environmental Science & Technology*, 53, 12529-12538, 2019.
- Mendoza-Villafuerte, P., Suarez-Bertoa, R., Giechaskiel, B., Riccobono, F., Bulgheroni, C., Astorga, C., and Perujo, A.: NO<sub>x</sub>, NH<sub>3</sub>, N<sub>2</sub>O and PN real driving emissions from a Euro VI heavy-duty vehicle. Impact of regulatory on-road test conditions on emissions, *Sci Total Environ*, 609, 546-555, 10.1016/j.scitotenv.2017.07.168, 2017.
- Ntziachristos, L., Gkatzoflias, D., Kouridis, C., and Samaras, Z.: COPERT: A European Road Transport Emission Inventory Model, 2009.
- Preble, C. V., Harley, R. A., and Kirchstetter, T. W.: Control Technology-Driven Changes to In-Use Heavy-Duty Diesel Truck Emissions of Nitrogenous Species and Related Environmental Impacts, *Environmental Science & Technology*, 53, 14568-14576, 10.1021/acs.est.9b04763, 2019.
- Selleri, T., Melas, A., Bonnel, P., and Suarez-Bertoa, R.: NH<sub>3</sub> and CO Emissions from Fifteen Euro 6d and Euro 6d-TEMP Gasoline-Fuelled Vehicles, *Catalysts*, 12, 245, 2022.
- Suarez-Bertoa, R., Zardini, A. A., and Astorga, C.: Ammonia exhaust emissions from spark ignition vehicles over the New European Driving Cycle, *Atmospheric Environment*, 97, 43-53, 10.1016/j.atmosenv.2014.07.050, 2014.
- Suarez-Bertoa, R., Mendoza-Villafuerte, P., Bonnel, P., Lilova, V., Hill, L., Perujo, A., and Astorga, C.: On-road measurement of NH<sub>3</sub> and N<sub>2</sub>O emissions from a Euro V heavy-duty vehicle, *Atmospheric Environment*, 139, 167-175, 10.1016/j.atmosenv.2016.04.035, 2016.
- Suarez-Bertoa, R., Zardini, A. A., Lilova, V., Meyer, D., Nakatani, S., Hibel, F., Ewers, J., Clairotte, M., Hill, L., and Astorga, C.: Intercomparison of real-time tailpipe ammonia measurements from vehicles tested over the new world-harmonized light-duty vehicle test cycle (WLTC), *Environ Sci Pollut Res Int*, 22, 7450-7460, 10.1007/s11356-015-4267-3, 2015.
- Sun, K., Tao, L., Miller, D. J., Khan, M. A., and Zondlo, M. A.: On-road ammonia emissions characterized by

mobile, open-path measurements, *Environ Sci Technol*, 48, 3943-3950, 10.1021/es4047704, 2014.

Sun, K., Tao, L., Miller, D. J., Pan, D., Golston, L. M., Zondlo, M. A., Griffin, R. J., Wallace, H. W., Leong, Y. J., Yang, M. M., Zhang, Y., Mauzerall, D. L., and Zhu, T.: Vehicle Emissions as an Important Urban Ammonia Source in the United States and China, *Environ Sci Technol*, 51, 2472-2481, 10.1021/acs.est.6b02805, 2017.

Tadano, Y. S., Borillo, G. C., Godoi, A. F., Cichon, A., Silva, T. O., Valebona, F. B., Errera, M. R., Penteadó Neto, R. A., Rempel, D., Martin, L., Yamamoto, C. I., and Godoi, R. H.: Gaseous emissions from a heavy-duty engine equipped with SCR aftertreatment system and fuelled with diesel and biodiesel: assessment of pollutant dispersion and health risk, *Sci Total Environ*, 500-501, 64-71, 10.1016/j.scitotenv.2014.08.100, 2014.

Vieira, M. S., Ito, D. T., Pedrotti, J. J., Coelho, L. H. G., and Fornaro, A.: Gas-phase ammonia and water-soluble ions in particulate matter analysis in an urban vehicular tunnel, *Environ Sci Pollut R*, 23, 19876-19886, 2016.

Wang, X., Ge, Y., Gong, H., Yang, Z., Tan, J., Hao, L., and Su, S.: Ammonia emissions from China-6 compliant gasoline vehicles tested over the WLTC, *Atmospheric Environment*, 2018.
